# Supplementary material for: A 3D porous metal–organic framework containing nanotubes based on multiple helices
Source: Royal Society of Chemistry journal article supplement (doi:10.1039/c3dt50506e), 2013-01-01
Supplement: c3dt50506e.pdf [file c3dt50506e.pdf]

## *Supporting Information*

# A 3D porous metal-organic framework containing nanotubes based on the multiple helices

**Lei Hou,\* Li-Na Jia, Wen-Juan Shi, Li-Yun Du, Jiang Li, Yao-Yu Wang\* and Qi-Zhen Shi**

Key Laboratory of Synthetic and Natural Functional Molecule Chemistry of the Ministry of Education, Shaanxi Key Laboratory of Physico-Inorganic Chemistry, College of Chemistry & Materials Science, Northwest University, Xi'an 710069 (P. R. China).

Email: lhou2009@nwu.edu.cn; wyaoyu@nwu.edu.cn, Tel: 86 29 88302604

## **Experimental**

### **Materials and Measurements**

All solvents and starting materials for synthesis were purchased commercially. Infrared spectra were obtained in KBr discs on a Nicolet Avatar 360 FTIR spectrometer in the 400-4000  $\text{cm}^{-1}$  region. Elemental analyses of C, H and N were determined with a Perkin-Elmer 2400C Elemental Analyzer. Thermalgravimetric analyses (TGA) were carried out in nitrogen stream using a Netzsch STA 449C equipment at a heating rate of 10  $^{\circ}\text{C}/\text{min}$ . Powder X-ray diffraction (PXRD) data were recorded on a Bruker D8 ADVANCE X-ray powder diffractometer (Cu  $K\alpha$ , 1.5418 Å).

**Synthesis of Complex  $[\text{Co}_2(\text{bpdc})_{1.5}(\text{Hbpz})]\cdot(\text{DMF})\cdot(\text{CH}_3\text{CN})\cdot(\text{H}_2\text{O})$  (**1**).** a mixture of  $\text{Co}(\text{CH}_3\text{COO})_2\cdot 4\text{H}_2\text{O}$  (0.050 g, 0.20 mmol),  $\text{H}_2\text{bpdc}$  (0.072 g, 0.30 mmol) and  $\text{H}_2\text{bpz}$  (0.038g, 0.20 mmol) in DMF (5mL) and  $\text{CH}_3\text{CN}$  (5mL) was placed in a Teflon-lined stainless steel vessel (15 mL), which was heated at 160  $^{\circ}\text{C}$  for 72 h, then cooled to room temperature at a rate of 5  $^{\circ}\text{C}/\text{h}$ . Finally, prism purple crystals of **1** were obtained, which were isolated by

washing with DMF, and dried in vacuo (Yield: about 10 mg). Anal. Calcd for C<sub>36</sub>H<sub>37</sub>Co<sub>2</sub>N<sub>6</sub>O<sub>8</sub>: C, 50.08; H, 4.66; N, 10.51%. Found: C, 50.14; H, 4.59; N, 10.46%. IR (KBr, cm<sup>-1</sup>): 3426(vs), 2930(m), 2214(w), 1658(s), 1608(s), 1540(s), 1400(vs), 1259(w), 1172(w), 1039(m), 843(m), 768(m), 681(m).

### Sorption Measurements

The sorption isotherms were measured using a Micrometrics ASAP 2020M instrument at different temperatures. The samples were activated in a quartz tube and dried under vacuum at 120 °C for 5 h to remove the solvent molecules prior to measurements.

### Crystallography

Diffraction data were collected with a Mo K $\alpha$  radiation ( $\lambda = 0.71073$  Å) on a Bruker-AXS SMART CCD area detector diffractometer. Absorption corrections were carried out utilizing SADABS routine.<sup>1</sup> The structure was solved by the direct methods and refined by full-matrix least-squares refinements based on  $F^2$ .<sup>2</sup> All non-hydrogen atoms were refined anisotropically. The hydrogen atoms were added to their geometrically ideal positions. **1** contains highly disordered solvent molecules, which can not be identified from the difference Fourier map. So the SQUEEZE routine<sup>3</sup> was applied to remove the contributions to the scattering from the solvents. The reported refinement is of the guest-free structure using the \*.hkp file produced by the SQUEEZE routine. The final formula was determined by combining single-crystal structures, elemental microanalyses and TGA. Relevant crystallographic data is listed in Table S1. Selected bond lengths and angles are given in Table S2.

### References

- 1 Bruker. *SADABS, SMART and SAINT*. Bruker AXS Inc., Madison, Wisconsin, USA, 2002.
- 2 G. M. Sheldrick, *SHELXL-97, program for the refinement of the crystal structures*. University of Göttingen, Germany, 1997.
- 3 A. L. Spek, *J. Appl. Crystallogr.*, 2003, **36**, 7.

**Table 1.** Crystallographic Data and Structural Refinements for **1**<sup>a</sup>

|                                                    |                                                                               |
|----------------------------------------------------|-------------------------------------------------------------------------------|
| complex                                            | <b>1</b>                                                                      |
| formula                                            | C <sub>31</sub> H <sub>25</sub> Co <sub>2</sub> N <sub>4</sub> O <sub>6</sub> |
| formula weight                                     | 667.41                                                                        |
| <i>T</i> (K)                                       | 296(2)                                                                        |
| crystal system                                     | tetragonal                                                                    |
| space group                                        | <i>I</i> 4 <sub>1</sub> / <i>a</i>                                            |
| <i>a</i> (Å)                                       | 43.939(10)                                                                    |
| <i>c</i> (Å)                                       | 8.5387(19)                                                                    |
| <i>V</i> (Å <sup>3</sup> )                         | 16485(6)                                                                      |
| <i>Z</i>                                           | 16                                                                            |
| <i>D</i> <sub>c</sub> (g cm <sup>-3</sup> )        | 1.076                                                                         |
| <i>μ</i> (mm <sup>-1</sup> )                       | 0.841                                                                         |
| reflns collected/unique                            | 42861/8089                                                                    |
| <i>R</i> <sub>int</sub>                            | 0.0503                                                                        |
| <i>R</i> <sub>1</sub> <sup>a</sup> (>2σ/all data)  | 0.0345 / 0.0492                                                               |
| <i>wR</i> <sub>2</sub> <sup>a</sup> (>2σ/all data) | 0.0930 / 0.0977                                                               |
| GOF                                                | 1.002                                                                         |

$$^aR_1 = \frac{\sum ||F_o| - |F_c||}{\sum |F_o|}; wR_2 = \left[ \frac{\sum w(F_o^2 - F_c^2)^2}{\sum w(F_o^2)^2} \right]^{1/2}.$$

**Table S2.** Selected Bond Lengths (Å) and Bond Angles (°) for **1**<sup>a</sup>

|                               |            |                                              |           |
|-------------------------------|------------|----------------------------------------------|-----------|
| Co(1)-O(1)                    | 1.9669(17) | O(1)-Co(1)-O(3) <sup>#1</sup>                | 101.85(8) |
| Co(1)-O(3) <sup>#1</sup>      | 1.9705(16) | O(5)-Co(1)-N(1)                              | 115.22(8) |
| Co(1)-O(5)                    | 1.9207(17) | O(1)-Co(1)-N(1)                              | 108.65(8) |
| Co(1)-N(1)                    | 1.9890(17) | O(3) <sup>#1</sup> -Co(1)-N(1)               | 114.72(7) |
| Co(2)-O(2)                    | 1.9419(16) | O(2)-Co(2)-O(4) <sup>#1</sup>                | 103.62(7) |
| Co(2)-O(4) <sup>#1</sup>      | 1.9660(16) | O(2)-Co(2)-N(2)                              | 117.19(8) |
| Co(2)-N(2)                    | 1.9933(17) | O(4) <sup>#1</sup> -Co(2)-N(2)               | 111.64(7) |
| Co(2)-N(3) <sup>#2</sup>      | 2.0223(18) | O(2)-Co(2)-N(3) <sup>#2</sup>                | 107.63(8) |
| O(5)-Co(1)-O(1)               | 102.22(9)  | O(4) <sup>#1</sup> -Co(2)-N(3) <sup>#2</sup> | 106.67(7) |
| O(5)-Co(1)-O(3) <sup>#1</sup> | 112.38(8)  | N(2)-Co(2)-N(3) <sup>#2</sup>                | 109.47(7) |

<sup>a</sup>Symmetry codes: #1 *y*-3/4, -*x*+5/4, *z*-3/4; #2 -*y*+5/4, *x*+1/4, -*z*+5/4.

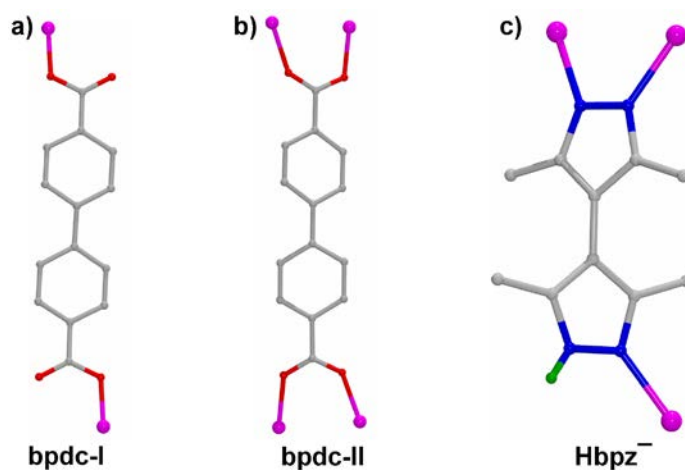

**Fig. S1** Coordination fashions of  $\text{bpdc}^{2-}$  and  $\text{Hbpz}^-$  ligands.

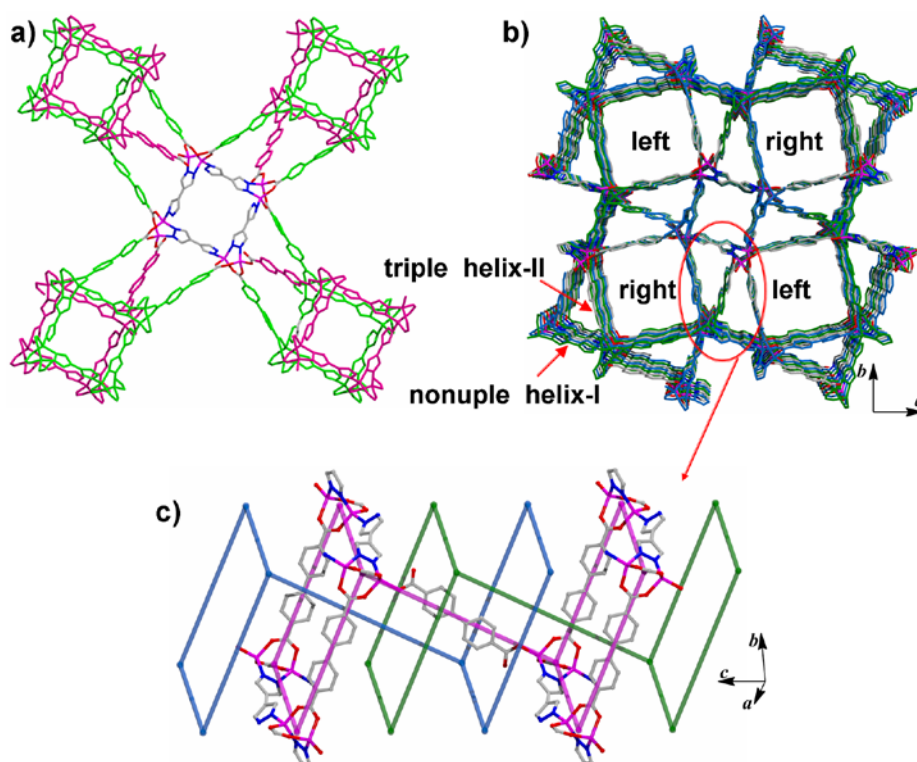

**Fig. S2** a) Each  $[\text{Co}_2(\text{CO}_2)_2(\text{Hbpz})]_4$  molecular building block (MBB) connecting adjacent eight MBBs through twelve  $\text{bpdc}^{2-}$  linkers. b) The 3-fold interpenetrated 3D structure of **1** along the  $c$  axis, featuring the superposed stacks, and adjacent nanotubes exhibiting opposite chirality. c) A coplanar square ring comprised of four  $\text{Co}_2$  clusters, two  $\text{bpdc-II}$ , and two  $\text{Hbpz}^-$ , which has a large windows (sizes ca.  $11.5 \times 7.5 \text{ \AA}^2$ ), and enables two  $\text{bpdc-I}$  from other two frameworks to traverse.

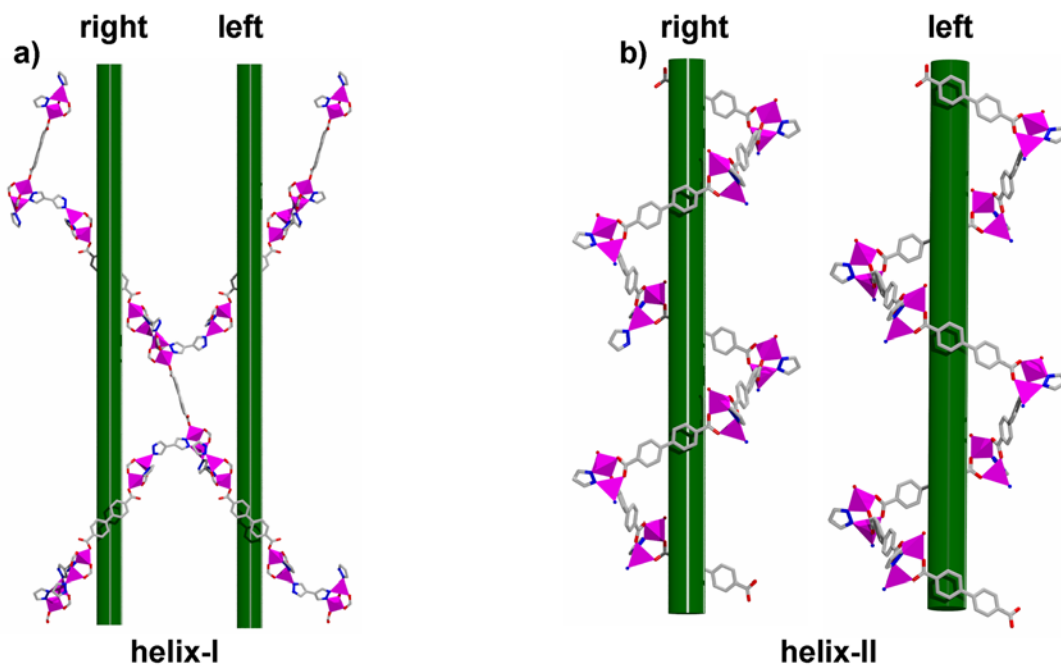

**Fig. S3** a) Right- and left-handed helix-I generated through the linkage of  $\text{Co}_2$  clusters with bpdc-I and Hbpz<sup>-</sup> ligands, possessing the shared bpdc-I ligands between two helices. b) Right- and left-handed helix-II based on  $\text{Co}_2$  clusters and bpdc-II.

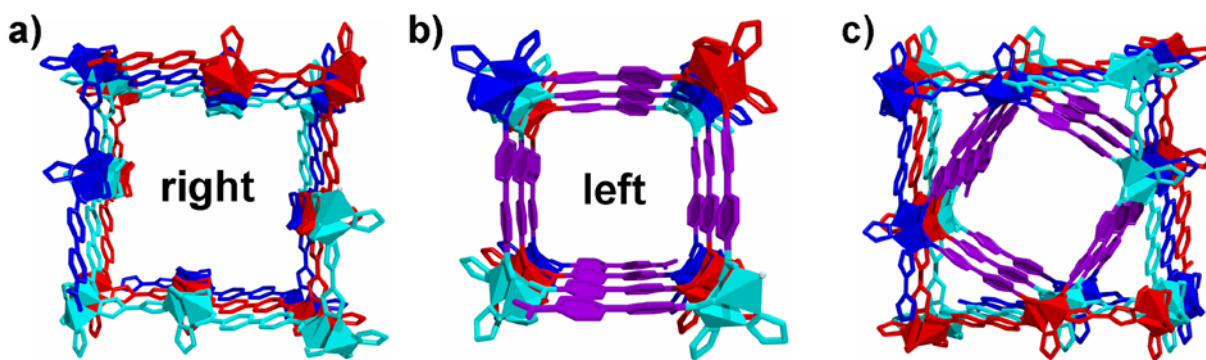

**Fig. S4** a) 3-fold right-handed nanotubular helix-I and b) left-handed nanotubular helix-II in a single framework, and c) three helix-I cycling one helix-II by sharing  $\text{Co}_2$  dimers to generate a “3+1” type quadruple helices.

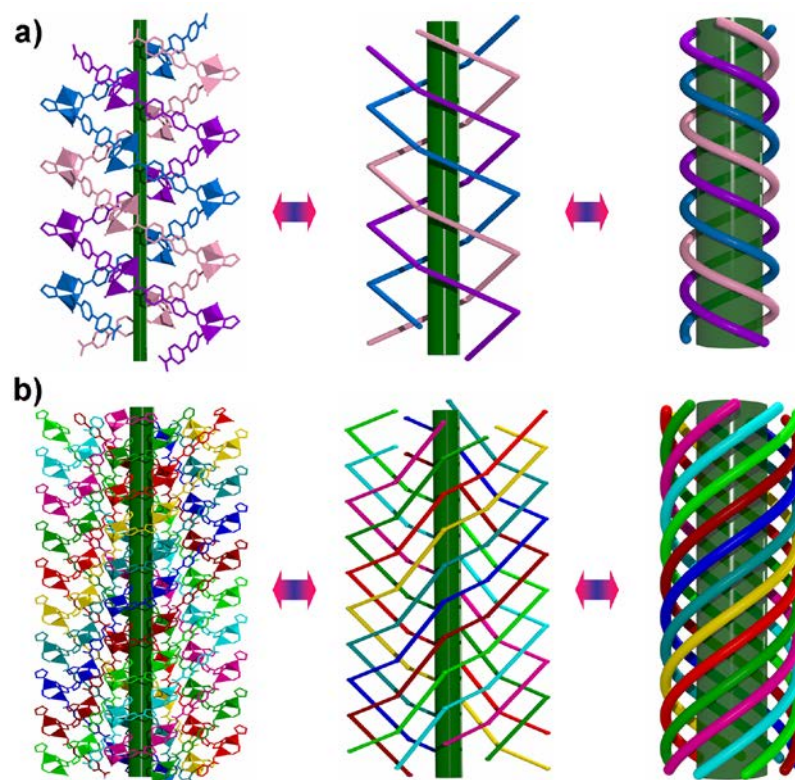

**Fig. S5** The nanotubular architectures in **1** generated through the parallel associations of triple left-handed (a) and nonuple right-handed helical chains, respectively.

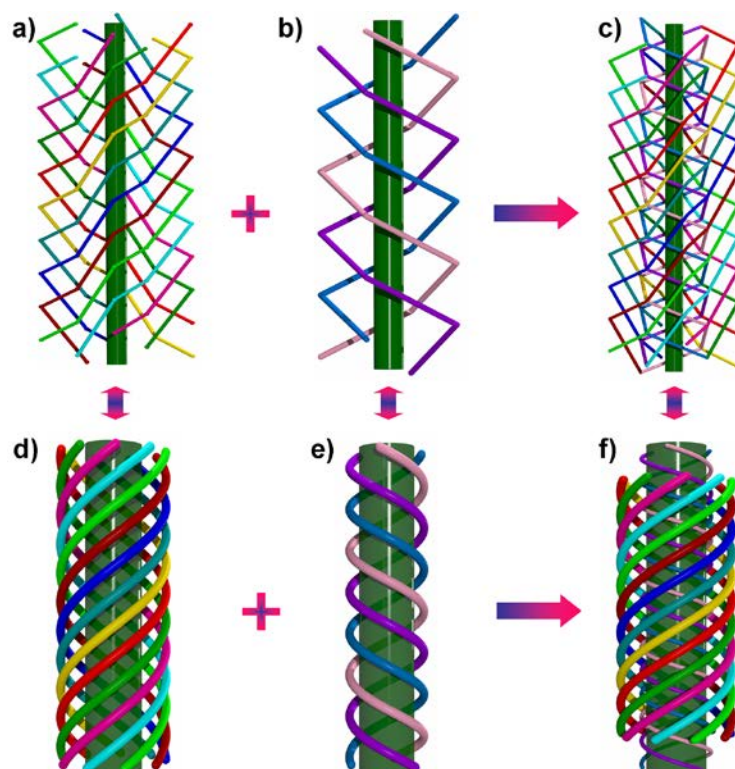

**Fig. S6** The double-walled nanotube created through nonuple and triple helices with opposite chirality in **1**.



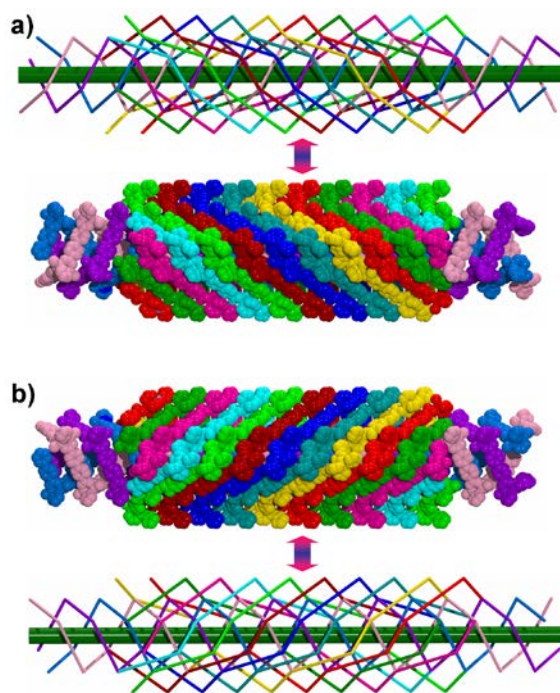

**Fig. S7** Two opposite chiral double-walled nanotubes with twelvefold helices in **1**.

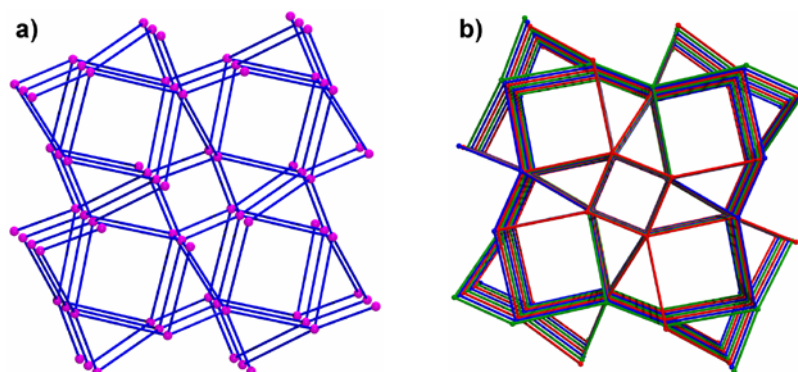

**Fig. S8** a) The single 5-connected zfy topology net, and b) its 3-fold interpenetrated fashion in **1**.

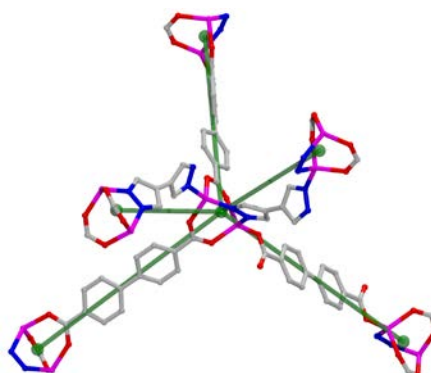

**Fig. S9** The distorted pyramidal geometry of 5-connected  $\text{Co}_2$  cluster in **1**, resulting from the significant torsion of  $\text{Hbpz}^-$  ligands.

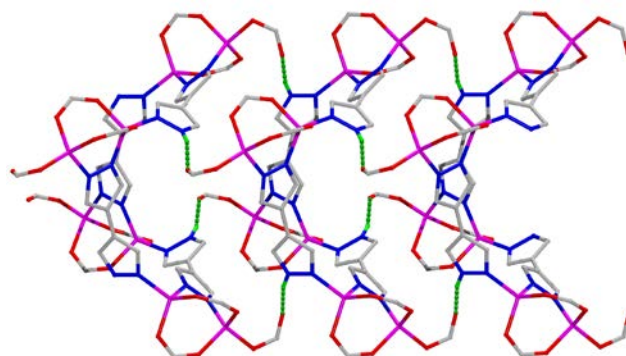

**Fig. S10** The N–H···O hydrogen bonding interactions ( $H\cdots O = 1.959 \text{ \AA}$ ,  $N\cdots O = 2.795 \text{ \AA}$ ,  $\angle N-H\cdots O = 153.15^\circ$ ) between pyrazole –NH groups and uncoordinated carboxylate O atoms in the  $[Co_2(CO_2)_2(Hbpz)_4]$  MBBs from adjacent frameworks, which contribute to stabilize the framework of **1**.

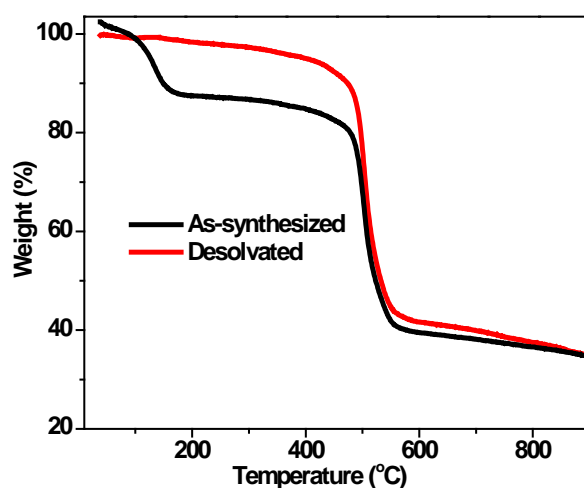

**Fig. S11** TGA plots of the as-synthesized and desolvated **1** under  $N_2$  atmosphere.

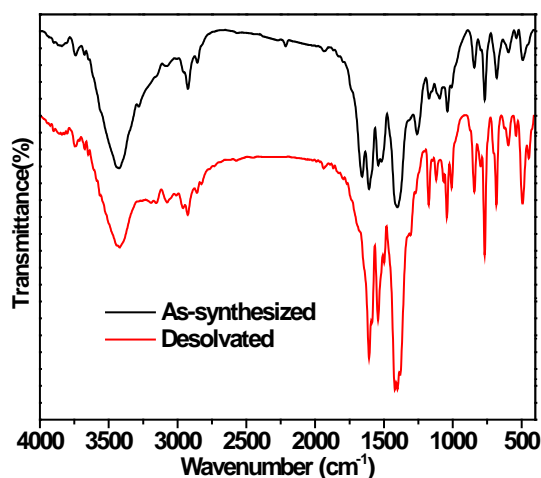

**Fig. S12** FTIR spectra of the as-synthesized and desolvated **1**. In the spectrum of the as-synthesized **1**, the weak peak at  $2214 \text{ cm}^{-1}$  and strong peak at  $1658 \text{ cm}^{-1}$  are designated to



the C≡N and C=O characteristic stretching peaks of the solvent CH<sub>3</sub>CN and DMF molecules, respectively. Heating the sample at 120 °C for 5 h under vacuum, the absence of peak at around 1660 cm<sup>-1</sup> in the IR spectrum of desolvated **1** indicates the complete removal of nonvolatile DMF solvents.

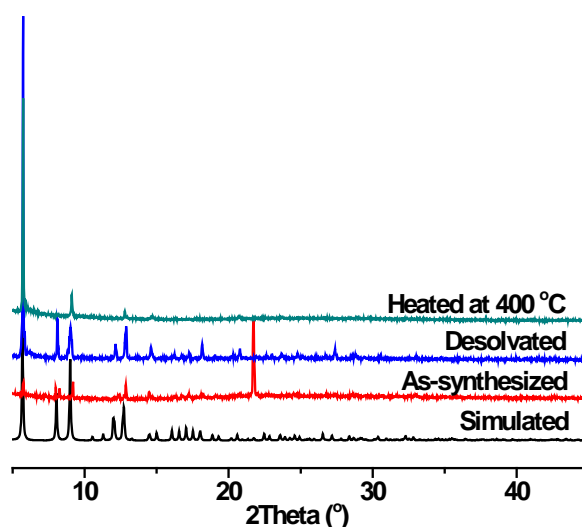

**Fig. S13** PXR D patterns of **1** simulated from the X-ray single-crystal structure, as-synthesized, desolvated (120 °C) and heated (400 °C) samples, reflecting highly crystalline even heated at 400 °C.

#### Calculation of sorption heat for CO<sub>2</sub> uptake using Virial 2 model

$$\ln P = \ln N + 1/T \sum_{i=0}^m a_i N^i + \sum_{i=0}^n b_i N^i \quad Q_{\text{st}} = -R \sum_{i=0}^m a_i N^i$$

The above equation was applied to fit the combined CO<sub>2</sub> isotherm data for **1** at 273.15 and 293.15 K, where  $P$  is the pressure,  $N$  is the adsorbed amount,  $T$  is the temperature,  $a_i$  and  $b_i$  are virial coefficients, and  $m$  and  $n$  are the number of coefficients used to describe the isotherms.  $Q_{\text{st}}$  is the coverage-dependent enthalpy of adsorption and  $R$  is the universal gas constant.

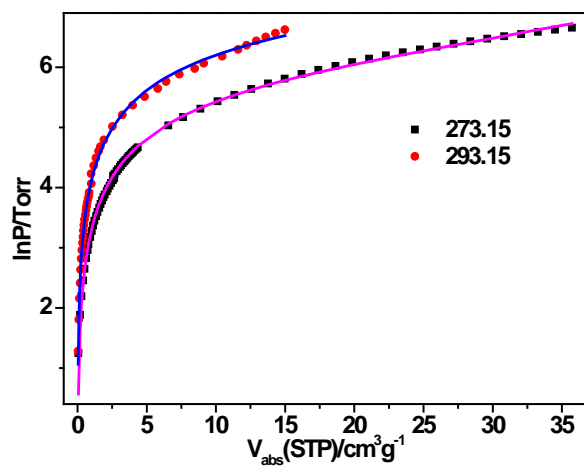

**Fig. S14** CO<sub>2</sub> adsorption isotherms for **1** with fitting by Virial 2 model. Fitting results:  $a_0 = -3316.04238$ ,  $a_1 = 20.39141$ ,  $a_2 = 0.14961$ ,  $b_0 = 15.45207$ ,  $b_1 = -0.0987$ .  $\chi^2 = 0.00788$ ,  $R^2 = 0.99591$ .
